# Supplementary material for: The photodecarboxylation of [N,N-bis(2-pyridylmethyl)amino acidato]phenanthrolinecobalt(III) complexes: – formation and decomposition of metallacyclic species †
Source: Royal Society of Chemistry journal article supplement (doi:10.1039/b003095n), 2000-01-01
Supplement: b003095n.doc [file b003095n.doc]

## Details of the decomposition experiments.

## Decomposition of the photolysis products 8-10

**Decomposition in neutral solutions**. The NMR-scale photolysates were stood for prolonged periods at room temperature and the appearance of decomposition products was monitored by NMR spectroscopy.

**Decomposition of 8** This complex has a half-life of around 1 week in D2O at rt. After three weeks, the solution was made alkaline with NaOD, and extracted into CDCl3. 1H NMR (CDCl3): Bis(2-pyridylmethyl)amine (bpa, **13**);  3.97 (s), 7.16-7.19 and 7.34-7.37 (both m, obscured by residual CHCl3), 7.63 (m, obscured by phen), 8.56 (d). Phen;  7.60-7.65 (m), 7.81 (s), 8.27 (d), 9.20 (d).

**Decomposition of 9** 1H NMR after standing at rt for 5 days (D2O): Acetaldehyde;  2.25 (d), 9.66 (m). [Co(phen)(bpa)(O2)Co(phen)(bpa)]4+ (**14**): 7.50-7.53 (m, 8H), 7.58-7.61 (m, 8H), 7.73-7.79 (m, 16 H), 7.95 (d, 8H), 8.06 (t, 8H), 8.27 (d, 8H), 8.97 (d, 8H). [Co(phen)3]3+;  7.65 (d), 7.92 (m), 8.47 (s), 9.05 (d). The D2O solution was made alkaline with NaOD and extracted with CDCl3. 1H NMR (CDCl3): Bpa;  3.97 (s), 7.16-7.19 and 7.34-7.37 (both m, obscured by residual CHCl3), 7.63 (m, obscured by phen), 8.56 (d). Phen;  7.60-7.65 (m), 7.81 (s), 8.27 (d), 9.20 (d). 1H NMR after standing at rt for 72 hours (DMSO-d6): Acetaldehyde;  2.11 (d, 3H, J = 2.9 Hz), 9.63 (m, 1H), however compound **9** stilldominated the spectrum.

**Decomposition of 10** This complex has a half-life of around 8-9 hours in D2O at room temperature. 1H NMR (D2O): Cyclopropanecarboxaldehyde (**12**);  1.19-1.24 (m, 4H), 1.76-1.80 (m, 1H), 8.70 (d, 1H). **14**; 7.50-7.53 (m, 8H), 7.58-7.61 (m, 8H), 7.73-7.79 (m, 16 H), 7.95 (d, 8H), 8.06 (t, 8H), 8.27 (d, 8H), 8.97 (d, 8H). The D2O sample was extracted with CDCl3.1H NMR (CDCl3): **12**;  1.07-1.10 (m, 4H, cyclopropyl CH2), 1.85 (m, 1H, cyclopropyl CH), 8.90 (d, 1H, J = 5.9 Hz, aldehyde H). The solution was too dilute to record a 13C spectrum. 1H NMR (DMSO-d6):  1.03 and 1.05 (m, 4H, cyclopropyl CH2), 1.71-1.77 (m, 1H, cyclopropyl CH), 8.73 (d, 1H, J = 6.5 Hz, aldehyde H). 13C NMR (DMSO-d6):  6.52, 50.08, 123.17, 123.62, 127.81, 137.34, 148.98, 151.74, 157.49.

## Decomposition in acidic solution

**Acidic decomposition** **of 8** Concentrated DCl was added to a solution of **8** in D2O (resulting [DCl] = approximately 0.5 M). The 1H NMR of this solution was monitored periodically. The peaks due to **8** disappeared over a period of weeks. 1H NMR after 21 days (DCl): Phen;  8.05 (m, 2H), 8.21 (s, 2H), 8.94 (d, 2H), 9.21 (d, 2H). Some minor unidentified peaks were also present;  1.48 (d), 4.45 (s). The solution was made alkaline with NaOD and extracted with CDCl3. 1H NMR (CDCl3): Bpa;  3.97 (s), 7.16-7.19 and 7.34-7.37 (both m, obscured by residual CHCl3), 7.63 (m, obscured by phen), 8.56 (d). Phen;  7.60-7.65 (m), 7.81 (s), 8.27 (d), 9.20 (d).

**Acidic decomposition of 9** Concentrated DCl was added to a solution of **9** in D2O (resulting [DCl] = approximately 0.5 M). The 1H NMR of this solution was monitored periodically. The peaks due to **9** disappeared with a half-life of around 24 hours. The acetaldehyde was present in a low concentration due to evaporation, and only its methyl group could be identified with certainty. 1H NMR after 3 days (DCl): Acetaldehyde;  2.25 (d, CH3). Phen;  8.05 (m, 2H), 8.21 (s, 2H), 8.94 (d, 2H), 9.21 (d, 2H). Some minor unidentified peaks were also present;  1.48 (d), 4.45 (s). The solution was basified with NaOD and extracted with CDCl3.  1H NMR (CDCl3): Bpa;  3.97 (s), 7.16-7.19 and 7.34-7.37 (both m, partially obscured by residual CHCl3), 7.63 (m, obscured by phen), 8.56 (d). Phen;  7.60-7.65 (m), 7.81 (s), 8.27 (d), 9.20 (d). No unidentified peaks were present in the aromatic region, however peaks at  2.61 (s) and  1.25 (s) remained unassigned.

## X-ray Crystallography

The X-ray data were collected with a Siemens P4 four circle diffractometer with graphite monochromated Mo-K ( = 0.71073 Å) radiation. The unit cell parameters were determined from an initial measurement of 15-30 strong reflections. The intensities of several check reflections were monitored during the data collection and data weighted accordingly if crystal decay was demonstrable. The structures were solved by direct methods using the XSCANS[[1]](#endnote-2) programme. The full-matrix least-squares refinement based on F2  made use of the SHELXTL software package.[[2]](#endnote-3) Lorentz and polarisation corrections were applied to the raw data, and absorption corrections were applied using the SADABS program (except for the peroxo complex where no correction was applied). Neutral scattering factors and anomalous dispersion corrections for non-hydrogen atoms were taken from the literature.[[3]](#endnote-4)

1. *X*-Ray *S*ingle *C*rystal *An*alysis *S*ystem; Version 2.1; Siemens Analytical Instrument Inc.: Madison, Wisconsin, USA. [↑](#endnote-ref-2)
2. G. M. Sheldrick, *SHELXTL Structure Determination Programs Version 5.03*; Siemens Analytical Instruments Inc.: Madison, Wisconsin, 1994. [↑](#endnote-ref-3)
3. W. C. Hamilton, J. A. Ibers (Eds), *International Tables for Crystallography (C)*; Kynock Press: Birmingham, 1992. [↑](#endnote-ref-4)
